# Supplementary material
Source: PubMed Central journal article supplement (PMC8081115)
Supplement: NIHMS1662805-supplement-006799_supplemental_material.pdf [file NIHMS1662805-supplement-006799_supplemental_material.pdf]

**Supplement Table I – FHS Exam 14 variables**

|           | <b>Variable Label</b>  |
|-----------|------------------------|
| <b>1</b>  | SPOUSE-SEX             |
| <b>2</b>  | AGE                    |
| <b>3</b>  | SEX                    |
| <b>4</b>  | MARITAL-STATUS         |
| <b>5</b>  | WEIGHT                 |
| <b>6</b>  | HEIGHT IN INCHES       |
| <b>7</b>  | SBP-NURSE              |
| <b>8</b>  | DBP-NURSE              |
| <b>9</b>  | SBP-PHYSICIAN-1ST      |
| <b>10</b> | DBP-PHYSICIAN-1ST      |
| <b>11</b> | SBP-PHYSICIAN-2ND      |
| <b>12</b> | DBP-PHYSICIAN-2ND      |
| <b>13</b> | CARBON-MONO-ECOLYZER   |
| <b>14</b> | VASCULOGRAM-LEFT       |
| <b>15</b> | VASCULOGRAM-RIGHT      |
| <b>16</b> | CARDIAC-GLYCOSIDES     |
| <b>17</b> | NITRITES               |
| <b>18</b> | PROPRANOLAL            |
| <b>19</b> | QUINIDINE-PROCAINAMIDE |
| <b>20</b> | DIURETICS-HYPERTENSION |
| <b>21</b> | DIURETICS-OTHER        |
| <b>22</b> | HYPO-EXCL-DIURETICS    |
| <b>23</b> | ANTI-CHOL-AGENTS       |
| <b>24</b> | THYROID                |
| <b>25</b> | ANTI-COAGULANTS        |
| <b>26</b> | INSULIN                |
| <b>27</b> | ORAL-HYPOGLYCEMI-AGENT |
| <b>28</b> | SLEEPING-PILLS         |
| <b>29</b> | TRANQUILIZERS          |
| <b>30</b> | BRONCHODILA-OR-AEROSOL |
| <b>31</b> | OTHER-MEDICINES        |
| <b>32</b> | HORMONE-TREATMENT      |

|    |                        |
|----|------------------------|
| 33 | HYSTERECTOMY           |
| 34 | OVARIES-REMOVED        |
| 35 | SMOKE-1YR-IN-LAST-2YRS |
| 36 | CIGARETTES-DAY         |
| 37 | CIGARS-DAY             |
| 38 | CIGARILLOS-DAY         |
| 39 | PIPES-DAY              |
| 40 | FILTER-CIGARETTES      |
| 41 | INHALES                |
| 42 | DIET-REDUCING          |
| 43 | CHOL-LOWERING-DIET     |
| 44 | LOW-SALT-DIET          |
| 45 | DIABETIC               |
| 46 | COFFEE-CUPS-DAY        |
| 47 | COFFEE-DECAF-CUPS-DAY  |
| 48 | TEA-CUPS-DAY           |
| 49 | COLA-BOTTLES-DAY       |
| 50 | BEER-WEEK              |
| 51 | WINE-WEEK              |
| 52 | COCKTAILS-WEEK         |
| 53 | EGGS-WEEK              |
| 54 | RED-MEAT-WEEK          |
| 55 | CHEESE-WEEK            |
| 56 | WHOLE-MILK-WEEK        |
| 57 | MARGARINE-VS-BUTTER    |
| 58 | FOLLOWING-DIET         |
| 59 | CHRONIC-COUGH          |
| 60 | TROUBLE-WHEEZ-ASTHMA   |
| 61 | DYSPNEA-ON-EXERTION    |
| 62 | DYSPNEA-INCRS-PAST-2YR |
| 63 | ORTHOPNEA              |
| 64 | PAROXYSMAL-NOCT-DYSPNE |
| 65 | ANKLE-EDEMA-BILATERAL  |
| 66 | FST-EXAMER-PULMONARY   |
| 67 | SND-EXAMER-PULMONARY   |

|     |                         |
|-----|-------------------------|
| 68  | CHEST-DISCOMFORT        |
| 69  | SUDDEN-MUSCULAR-WEAK    |
| 70  | SUDDEN-SPEECH-DIFFICULT |
| 71  | SUDDEN-VISUAL-DEFECT    |
| 72  | UNCONSCIOUSNESS         |
| 73  | DOUBLE-VISION           |
| 74  | LOSS-VISION-ONE-EYE     |
| 75  | NUMBNESS-TINGLING       |
| 76  | EVER-HAD-VARICOSE       |
| 77  | PHLEBITIS               |
| 78  | SWELL-LEG-UNILATERAL    |
| 79  | LEG-ULCERS              |
| 80  | TREAT-VARICOSE-VEINS    |
| 81  | FRACTURE-OR-SER-INJURY  |
| 82  | WEAR-RESTRICT-GARMENT   |
| 83  | POSITION-AT-WORK        |
| 84  | FAMILY-HISTORY-VARICOS  |
| 85  | DISCOMFORT-LOWER-LIMBS  |
| 86  | ONE-FOOT-COLDER-OTHER   |
| 87  | CORNEAL-ARCUS           |
| 88  | XANTHELASMA             |
| 89  | XANTHOMATA              |
| 90  | THYROID-SCAR            |
| 91  | SINGLE-NODULE           |
| 92  | MULTIPLE-NODULES        |
| 93  | DIFFUSE-ENLARGEMENT     |
| 94  | OTHER-MANIFEST-THYROID  |
| 95  | INC-ANTEROPosterior     |
| 96  | ABNORMAL-BREATH-SOUND   |
| 97  | RALES                   |
| 98  | FIXED-THORAC            |
| 99  | HEART-ENLARGEMENT       |
| 100 | GALLOP                  |
| 101 | OTHER-ABNORMAL-SOUND    |
| 102 | APEX-REGURG-OR-HOLO     |

|     |                        |
|-----|------------------------|
| 103 | APEX-EJECTION          |
| 104 | MIDPRECORDIUM          |
| 105 | BASE                   |
| 106 | MURMUR-INC-ON-VALSALVA |
| 107 | SYSTOLIC-MUR-VALVE     |
| 108 | DIASTOLIC-MURMUR       |
| 109 | NECK-VEIN-DISTENDED    |
| 110 | BREAST-ABNORMAL        |
| 111 | MASTECTOMY-SCAR-PRESE  |
| 112 | LOCALIZED-MASS         |
| 113 | AXILLARY-NODES         |
| 114 | LIVER-ENLARGED         |
| 115 | ABDOMINAL-ANEURYSM     |
| 116 | BRUIT                  |
| 117 | SURGICAL-SCAR          |
| 118 | OTHER-ABDOMINAL-ABNOR  |
| 119 | LEFT-ANKLE-EDEMA       |
| 120 | RIGHT-ANKLE-EDEMA      |
| 121 | LEFT-STEM-VARICOSITIES |
| 122 | RIGHT-STEM-VARICOSIT   |
| 123 | RETICULAR-VARICOSITIES |
| 124 | SPIDER-VARICOSITIES    |
| 125 | TEMP-DIFFER-IN-FEET    |
| 126 | ABSENT-OR-FEEBLE-PULSE |
| 127 | DORSAL-PEDIS           |
| 128 | POSTERIOR-TIBIAL       |
| 129 | FEMORAL                |
| 130 | RADIAL                 |
| 131 | PERIPHERAL-BRUIITS     |
| 132 | ARTERIAL-PERIPHERAL-1S |
| 133 | CHRO-VENOUS-INSUFF-W-O |
| 134 | CHRO-VENOU-INSUF-WITH  |
| 135 | ARTERIAL-PERIPHERAL-2N |
| 136 | CHRO-VENOU-INSUFF-W-O  |
| 137 | CHRO-VENOU-INSUF-WITH  |

|     |                        |
|-----|------------------------|
| 138 | SPEECH-DISTURBANCE     |
| 139 | DISTURBANCE-IN-GAIT    |
| 140 | LOCAL-MUSCLE-WEAKNESS  |
| 141 | VISUAL-DISTURBANCE     |
| 142 | ABNORMAL-REFLEXES      |
| 143 | CRANIAL-NERVE-ABNORMAL |
| 144 | CEREBELLAR-SIGNS       |
| 145 | SENSORY-IMPAIRMENT     |
| 146 | CAROTID-BRUIITS        |
| 147 | EAR-LOBE-CREASE        |
| 148 | VENTRICULAR-RATE-MIN   |
| 149 | P-R-INTERVAL           |
| 150 | QRS-INTERVAL           |
| 151 | QT-INTERVAL            |
| 152 | SIGN                   |
| 153 | AQRS                   |
| 154 | IVB-RIGHT              |
| 155 | IVB-LEFT               |
| 156 | HEMIBLOCK              |
| 157 | BIFASCICULAR           |
| 158 | ATRIOVENTRI-BK-INCOMP  |
| 159 | ATRIOVENTRI-BK-COMPL   |
| 160 | WPW-SUNDROME           |
| 161 | PREMATURE-BEATS        |
| 162 | ATRIAL-FIBRILLATION    |
| 163 | ATRIAL-FLUTTER         |
| 164 | U-WAVE                 |
| 165 | OTHER-ECG-ABNORMALITY  |
| 166 | TAK-DIGITALIS-QUINIDIN |
| 167 | MYOCARDIAL-INFARCTION  |
| 168 | L-VENTRICULAR-HYPERTRO |
| 169 | NS-T-WAVE-ABNORMALITY  |
| 170 | NS-S-T-SEGMENT-ABNORMA |
| 171 | ECG-CLINICAL-READING   |
| 172 | HYPERTENSIVE-STATUS    |

|     |                         |
|-----|-------------------------|
| 173 | UNDERTREAT-HYPERTEN     |
| 174 | HYPERTENSIVE-HEART-DIS  |
| 175 | DIAG-HHD-OUTSID-CRETE   |
| 176 | RHEUMATIC-HEART-DIS     |
| 177 | AORTIC-VALVE-DISEASE    |
| 178 | MITRAL-VALVE-DISEASE    |
| 179 | OTHER-HEART-DISEASE     |
| 180 | ARRHYTHMIA              |
| 181 | FUNCTIONAL-CLASS        |
| 182 | PVD-OTHER-MANIFESTAT    |
| 183 | VARICOSE-VEINS          |
| 184 | CHRO-VENOU-INSUF-W-O    |
| 185 | PHLEBITIS               |
| 186 | OTHER-VASCULAR-DISEASE  |
| 187 | OTHE-ASCULAR-BRAIN-DIS  |
| 188 | URINARY-TRACT-DISEASE   |
| 189 | PULMONARY-DISEASE       |
| 190 | CHRO-OBSTRUC-LUNG-DISE  |
| 191 | CHRONIC-BRONCHITIS      |
| 192 | GOUTY-ARTHRITIS         |
| 193 | OTHER-ARTHRITIS         |
| 194 | GALLBLADDER-DISEASE     |
| 195 | OBESITY                 |
| 196 | OTH-NON-CARDIO-DIAGNO   |
| 197 | CHEST-FILM-SATISFACTY   |
| 198 | GENERAL-CARDIC-ENLARG   |
| 199 | L-VENTRICULAR-HYPERTRO  |
| 200 | OTHER-CONTOUR           |
| 201 | TRANS-THORACIS-DIAMETER |
| 202 | TRANS-CARDIAC-DIAMETER  |
| 203 | HEART-LARG-THAN-PRE-EXM |
| 204 | PULM-VASCULAR-ENGORGE   |
| 205 | PLEURAL-EFFUSION        |
| 206 | DILATION                |
| 207 | ANEURYSM                |

|            |                       |
|------------|-----------------------|
| <b>208</b> | CALCIFICATION         |
| <b>209</b> | OTHER-AORTIC-ABNORMAL |
| <b>210</b> | OTHER-THORACIC-DISE   |
| <b>211</b> | HEMATOCRIT            |
| <b>212</b> | SUGAR                 |
| <b>213</b> | CREATININE            |
| <b>214</b> | CHOLESTEROL           |
| <b>215</b> | ALBUMIN-QUANTITEST    |
| <b>216</b> | OCCULT-BLOOD          |
| <b>217</b> | KETONE                |
| <b>218</b> | GLUCOSE               |
| <b>219</b> | ALBUMIN-DIP-STICK     |
| <b>220</b> | PH                    |
| <b>221</b> | NO-OF-BROTHER-DEAD    |
| <b>222</b> | NO-OF-SISTER-DEAD     |

**Supplement Table II: FHS Variable Field Names and Transformations for Analysis**

| <b>Study</b>                | <b>Risk Variable</b>                   | <b>BioLINCC File (sas7bdat)</b> | <b>Field Name</b>     | <b>Transformation</b>                                      |
|-----------------------------|----------------------------------------|---------------------------------|-----------------------|------------------------------------------------------------|
| FHS<br>Cohort<br>Exam<br>14 | Stroke                                 | vr_survcvd1_2011_m_0785d        | STROKE,<br>STROKEDATE | excluded participants<br>with an event prior to<br>exam 14 |
|                             | CHF                                    | vr_survcvd1_2011_m_0785d        | CHF, CHFDate          | excluded participants<br>with an event prior to<br>exam 14 |
|                             | CHD                                    | vr_survcvd1_2011_m_0785d        | CHD,<br>CHDDate       | excluded patients with an<br>event prior to exam 14        |
|                             | CVD                                    | vr_survcvd1_2011_m_0785d        | CVD,<br>CVDDate       | excluded participants<br>with an event prior to<br>exam 14 |
|                             | Age                                    | vr_dates_2014_a_0912d           | AGE14                 | none                                                       |
|                             | Gender                                 | vr_dates_2011_m_0689d           | SEX                   | 0 = Male, 1 = Female                                       |
|                             | SBP                                    | lex0_14                         | FG68, FG70,<br>FG72   | average of blood pressure<br>from all 3 variables          |
|                             | Hypertension<br>Treatment              | lex0_14                         | FG259                 | used to evaluate treated<br>and untreated SBP              |
|                             | Diabetes                               | vr_diab_ex28_0_0601d            | FG113                 | 0 = no condition, 1 =<br>condition                         |
|                             | Smoking                                | lex0_14                         | FG103                 | 0 = no, 1 = yes                                            |
|                             | Total<br>cholesterol                   | lex0_14                         | FG313                 | none                                                       |
|                             | HDL                                    | lex0_15                         | FH333                 | used HDL variable at<br>nearest exam (15)                  |
|                             | Coffee<br>Consumption                  | lex0_14                         | FG114                 | none                                                       |
|                             | Decaffeinated<br>coffee<br>consumption | lex0_14                         | FG115                 | none                                                       |
| Caffeine<br>consumption     | vr_ffreq_ex20_0_0572d                  | SCORE34                         | none                  |                                                            |



**Supplement Table III- CHS Variable Field Names and Transformations for Analysis**

| <b>Study</b>            | <b>Risk Variable</b>   | <b>BioLINCC File (sas7bdat)</b> | <b>Field Name</b>                   | <b>Transformation</b>                                                                                                   |
|-------------------------|------------------------|---------------------------------|-------------------------------------|-------------------------------------------------------------------------------------------------------------------------|
| CHS<br>baseline<br>exam | Stroke                 | eventsfinal                     | EVTYPE= 3, 6,<br>TTOEVENT           | data was subset to include only participants without a prior event and participants with the event matching the subtype |
|                         | CHF                    | eventsfinal                     | EVTYPE= 4,<br>TTOEVENT              | data was subset to include only participants without a prior event and participants with the event matching the subtype |
|                         | CHD                    | eventsfinal                     | EVTYPE =<br>1,2,7,8,11,<br>TTOEVENT | data was subset to include only participants without a prior event and participants with the event matching the subtype |
|                         | CVD                    | eventsfinal                     | EVTYPE =<br>1,2,7,8,11,<br>TTOEVENT | data was subset to include only participants without a prior event and participants with the event matching the subtype |
|                         | Age                    | basebothfinal                   | AGE2                                | lowest age in 2 year group                                                                                              |
|                         | Gender                 | basebothfinal                   | GEND01                              | 0 = Male, 1 = Female                                                                                                    |
|                         | SBP                    | basebothfinal                   | AVZMSYS                             | none                                                                                                                    |
|                         | Hypertension Treatment | basebothfinal                   | HTNMED06                            | used to evaluate treated and untreated SBP                                                                              |
|                         | Diabetes               | basebothfinal                   | DIABADA                             | 0 = no condition, 1 = condition                                                                                         |
|                         | Smoking                | basebothfinal                   | SMOKE                               | 0 = no, 1 = yes                                                                                                         |
| Total cholesterol       | basebothfinal          | CHOLADJ                         | none                                |                                                                                                                         |
| HDL                     | basebothfinal          | HDL44                           | none                                |                                                                                                                         |

|                                  |            |           |                                                       |
|----------------------------------|------------|-----------|-------------------------------------------------------|
| Coffee Consumption               | base2final | COFFE25   | values mapped to 0, 0.021, 0.07, 0.36, and 1 cups/day |
| Decaffeinated coffee consumption | base2final | COFFEED25 | values mapped to 0, 0.021, 0.07, 0.36, and 1 cups/day |
| Caffeine consumption             | yr8final   | CAFF65    | none                                                  |

**Supplement Table IV: ARIC Variable Field Names and Transformations for Analysis**

| <b>Study</b>             | <b>Risk Variable</b>             | <b>BioLINCC File (sas7bdat)</b> | <b>Field Name</b>                                           | <b>Transformation</b>                                                                  |
|--------------------------|----------------------------------|---------------------------------|-------------------------------------------------------------|----------------------------------------------------------------------------------------|
| ARIC<br>baseline<br>exam | Stroke                           | ichdps10                        | INDP10, FTDP10,                                             | excluded participants with an event prior to exam 1                                    |
|                          | CHF                              | ichdps10                        | INCHF10,<br>FUTIMEHF                                        | excluded participants with an event prior to exam 0                                    |
|                          | CHD                              | ichdps10                        | ISP10, FUIISP10                                             | excluded participants with an event prior to exam 1                                    |
|                          | CVD                              | ichdps10                        | ISP10, INDP10,<br>INCHF10, FTDP10,<br>FUTIMEHF,<br>FUIISP10 | any ISP10/INDP10/INCHF10 event, and time to was first date of FTDP10/FUTIMEHF/FUIISP10 |
|                          | Age                              | derive13                        | VIAGE01                                                     | none                                                                                   |
|                          | Gender                           | derive13                        | GENDER                                                      | 0 = Male, 1 = Female                                                                   |
|                          | SBP                              | sbpa02                          | SBPA21                                                      | none                                                                                   |
|                          | Hypertension Treatment           | derive13                        | HYPTMD01                                                    | used to evaluate treated and untreated SBP                                             |
|                          | Diabetes                         | derive13                        | DIABTS02                                                    | 0 = no condition, 1 = condition                                                        |
|                          | Smoking                          | derive13                        | CIGT01                                                      | 0 = no, 1 = yes                                                                        |
|                          | Total cholesterol                | derive13                        | TCHSIU01                                                    | converted to mg/dL                                                                     |
|                          | HDL                              | derive13                        | HDLSIU02                                                    | converted to mg/dL                                                                     |
|                          | Coffee Consumption               | dtia                            | DTIA61                                                      | values mapped to 0, 0.07, 0.14, 0.43, 0.79, 1, 2.5, 5, and 6.5 cups per day            |
|                          | Decaffeinated coffee consumption | Variable not in ARIC data       | Variable not in ARIC data                                   | N/A                                                                                    |
| Caffeine consumption     | anut2                            | CAFF                            | none                                                        |                                                                                        |
